# Supplementary material for: An etching–redeposition isomerization process for the shape control of anatase TiO2 nanocrystals
Source: Royal Society of Chemistry journal article supplement (doi:10.1039/c9qm00066f), 2019-01-01
Supplement: c9qm00066f1.pdf [file c9qm00066f1.pdf]

## Supplementary Information

### **An Etching-Redeposition Isomerization Process for the Shape Control of Anatase TiO<sub>2</sub> Nanocrystals**

*Xiaolei Yuan, Muhan Cao, Xiaojing Jiang, Lei Chen, Huicheng Hu, Yong Zhang, Linzhong Wu,  
Yiding Liu,\* and Qiao Zhang\**

X. Yuan, Dr. M. Cao, X. Jiang, L. Chen, H. Hu, Y. Zhang, L. Wu, Prof. Y. Liu and Prof. Q.  
Zhang

Institute of Functional Nano and Soft Materials (FUNSOM), Jiangsu Key Laboratory for  
Carbon-Based Functional Materials and Devices, Soochow University, 199 Ren'ai Road, Suzhou,  
215123, Jiangsu, People's Republic of China

E-mail: [qiaozhang@suda.edu.cn](mailto:qiaozhang@suda.edu.cn) (Q.Z.)

Prof. Y. Liu

Department of Radiology, Xinqiao Hospital, Third Military Medical University, Shapingba  
District, Chongqing, 400037, China

E-mail: [lyd0409@gmail.com](mailto:lyd0409@gmail.com) (Y.L.)

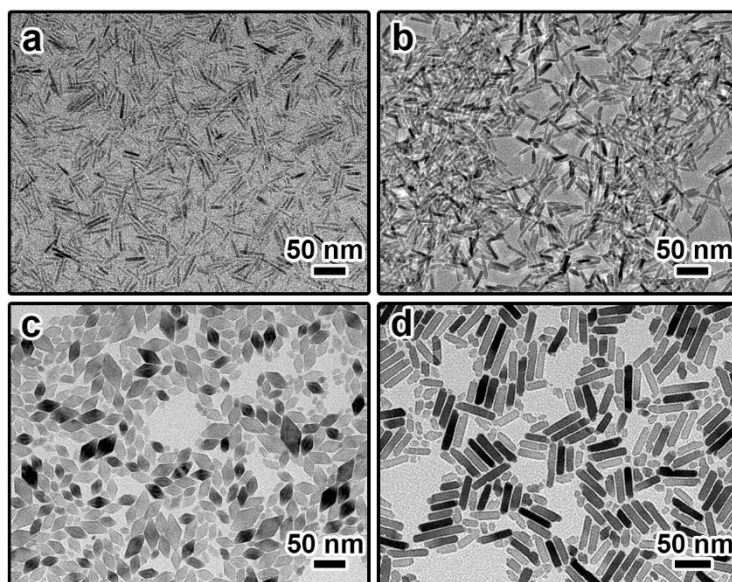

**Figure S1.** The influence of fluoride type and concentration on the transformation reaction. (a-c) TEM images of TiO<sub>2</sub> NCs synthesized in the presence of different concentration of NaF. (a) without addition of NaF, (b) NaF/TiO<sub>2</sub> molar ratio = 1:10, (c) NaF/TiO<sub>2</sub> molar ratio = 1:3. (d) TEM image of TiO<sub>2</sub> NCs synthesized in the presence NH<sub>4</sub>F (NH<sub>4</sub>F/TiO<sub>2</sub> molar ratio = 1:5) in substitution of NaF.

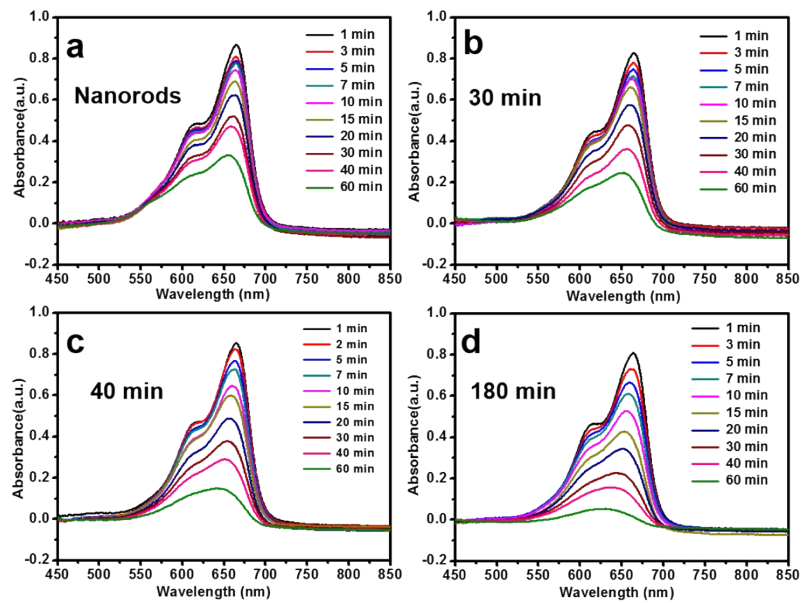

**Figure S2.** Absorption spectra of the MB aqueous solution at different reaction time with the addition of TiO<sub>2</sub> NCs with different shapes as photocatalysts: (a) Nanorods; (b) 30 min; (c) 40 min; (d) 180 min.

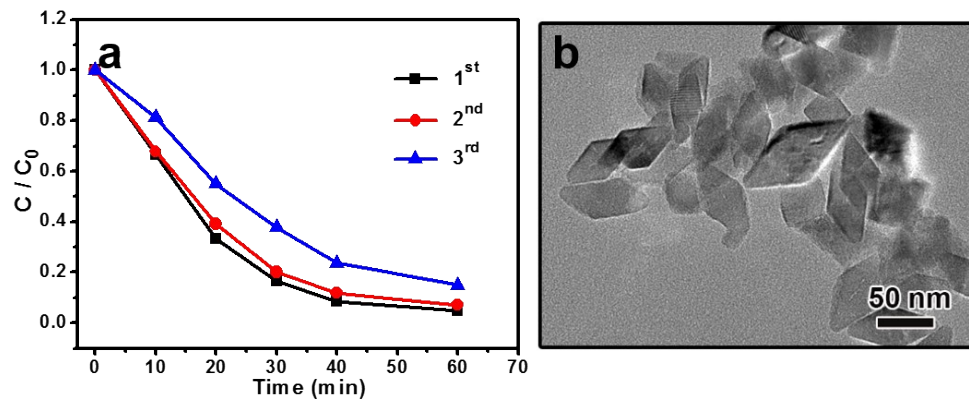

**Figure S3.** (a) Change of MB concentration versus UV irradiation time when the faceted TOB structure acted as photocatalysts. (b) TEM image of TOB nanocrystals after MB degradation process.
